# Supplementary material for: Autochthonous Human Schistosomiasis, Malaysia
Source: PubMed Central journal article supplement (PMC3739520; doi:10.3201/eid1908.121710), 2013-08
Supplement: 12-1710-Techapp-s1.pdf [file 12-1710-Techapp-s1.pdf]

# Autochthonous Human Schistosomiasis, Malaysia

## Technical Appendix

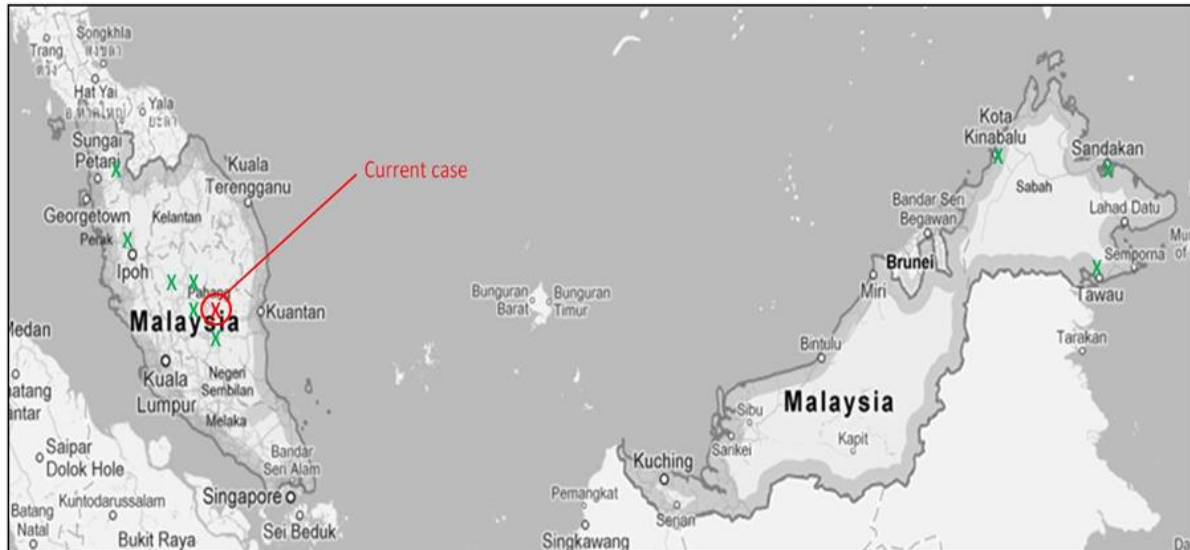

Technical Appendix Figure 1. Places of residence in Peninsular Malaysia (left) of the schistosomiasis-infected Orang Asli from the 1970s. The origin of the patient from the current report is marked with a red X in a circle; previous cases are marked with green Xs without circles. Three cases in persons also infected with *Schistosoma japonicum*-like eggs in Sabah, Malaysian Borneo (right), were immigrants and thus not considered autochthonous.

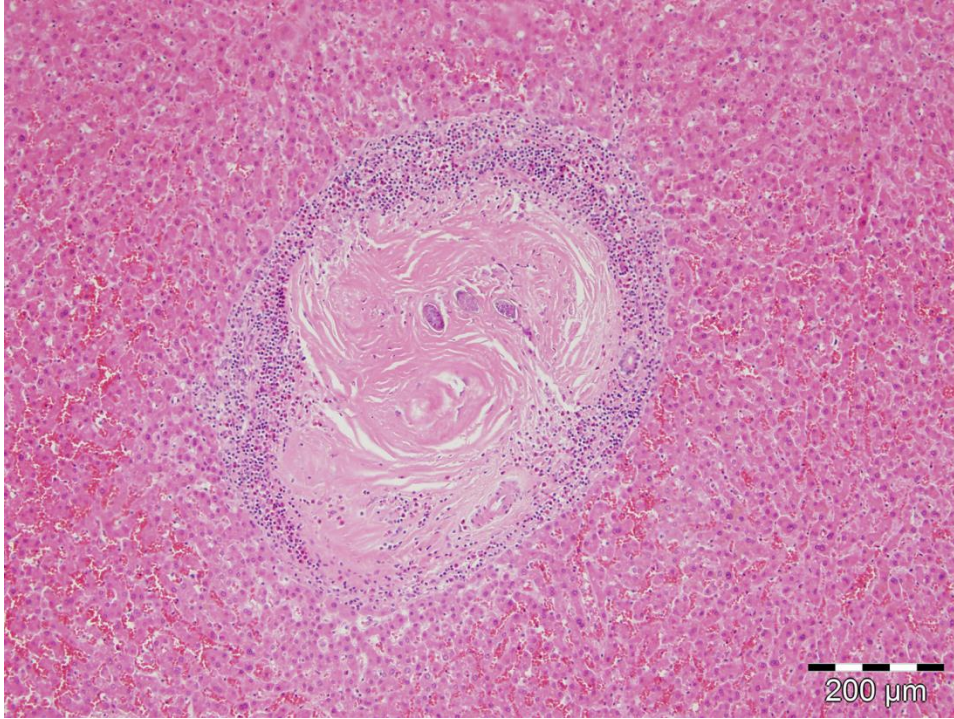

Technical Appendix Figure 2. Section of liver showing a helminth egg granuloma. The ova are embedded in fibrous tissue surrounded by a wall of eosinophils, lymphocytes, and monocytes. Hematoxylin and eosin stain, original magnification  $\times 10$ .
